# Supplementary material for: (E)-2-Cyano-3-(1H-Indol-3-yl)-N-Phenylacrylamide, a Hybrid Compound Derived from Indomethacin and Paracetamol: Design, Synthesis and Evaluation of the Anti-Inflammatory Potential
Source: PubMed Central journal article supplement (PMC7177726; doi:10.3390/ijms21072591), 2020-04-08

# (E)-2-cyano-3-(indol-3-yl)-N-phenylacrylamide, a Hybrid Compound Derived from Indomethacin and Paracetamol: Design, Synthesis and Evaluation of Anti-inflammatory Potential

Pablo Silva, Maria de Almeida, Jamire Silva, Sonaly Albino, Renan Espirito-Santo, Maria Lima, Cristiane Villarreal, Ricardo Moura, Vanda Santos.

## Supplementary data

*Supplementary data captions*

**Figure S1** FT-IR spectrum of ICMD-01

**Figure S2**  $^1\text{H}$  NMR spectrum of ICMD-01

**Figure S3**  $^{13}\text{C}$  NMR spectrum of ICMD-01

**Figure S4** HRMS  $m/z$  [ $\text{M}^+ + \text{Na}$ ] of ICMD-01

**Figure S5** 3D crystallographic pose of co-crystallized ligand indomethacin (yellow) and redocked ligand (gray) on binding site of cyclooxygenase-2 (4COX)

**Figure S1.** FT-IR spectrum of ICMD-01

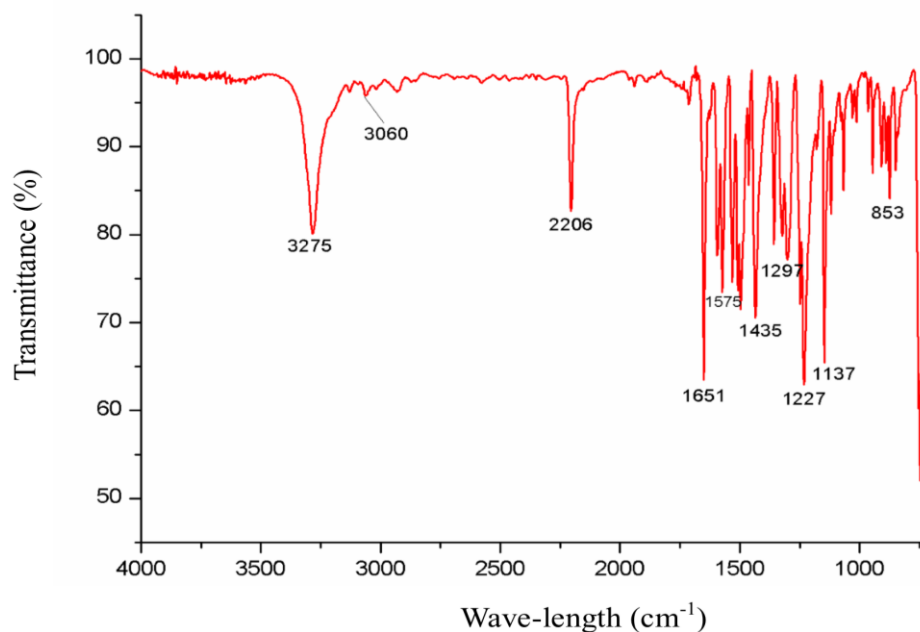

Figure S2. <sup>1</sup>H NMR spectrum of ICMD-01

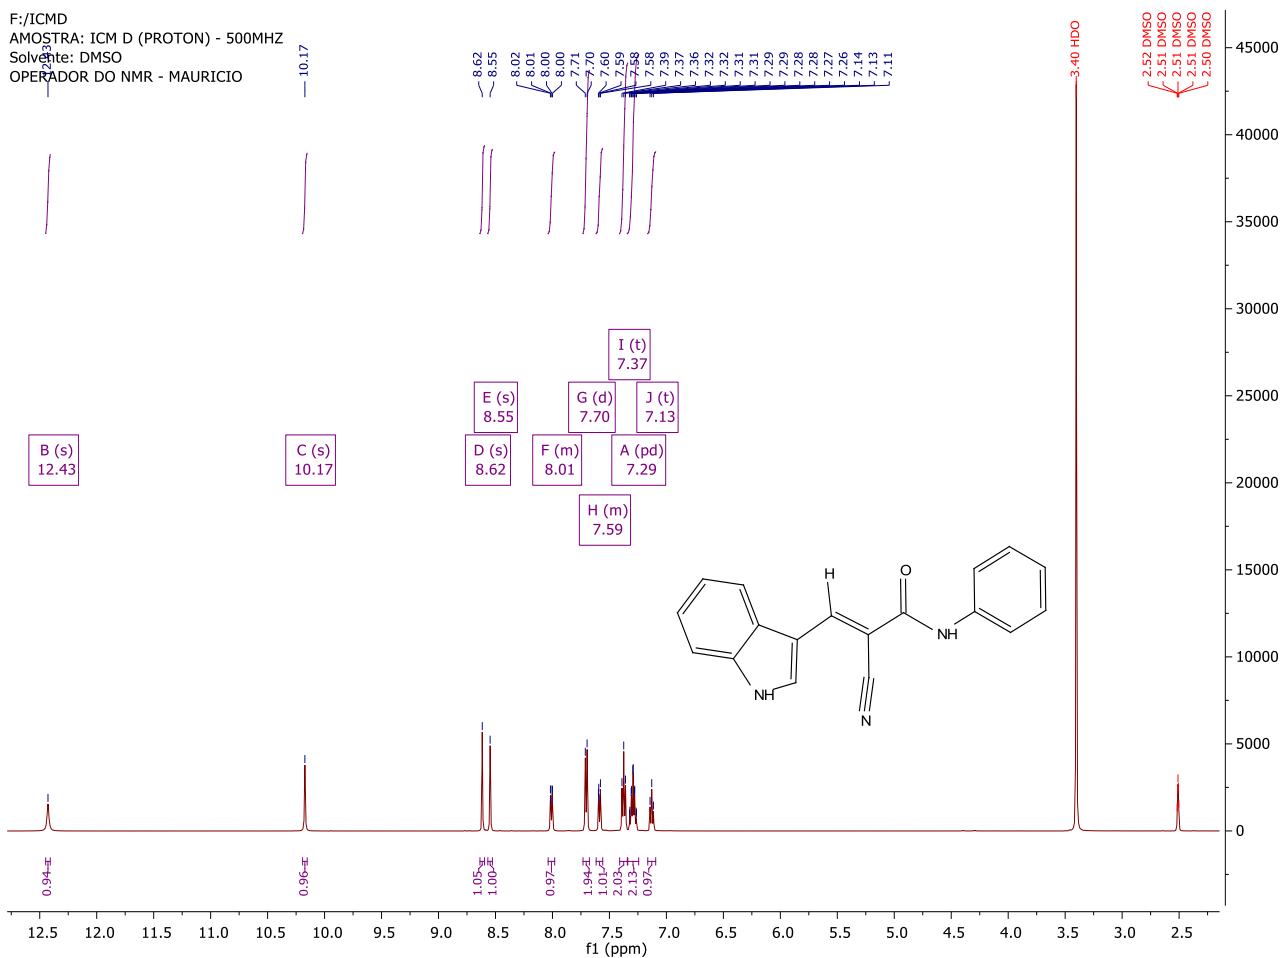

Figure S3. <sup>13</sup>C NMR spectrum of ICMD-01

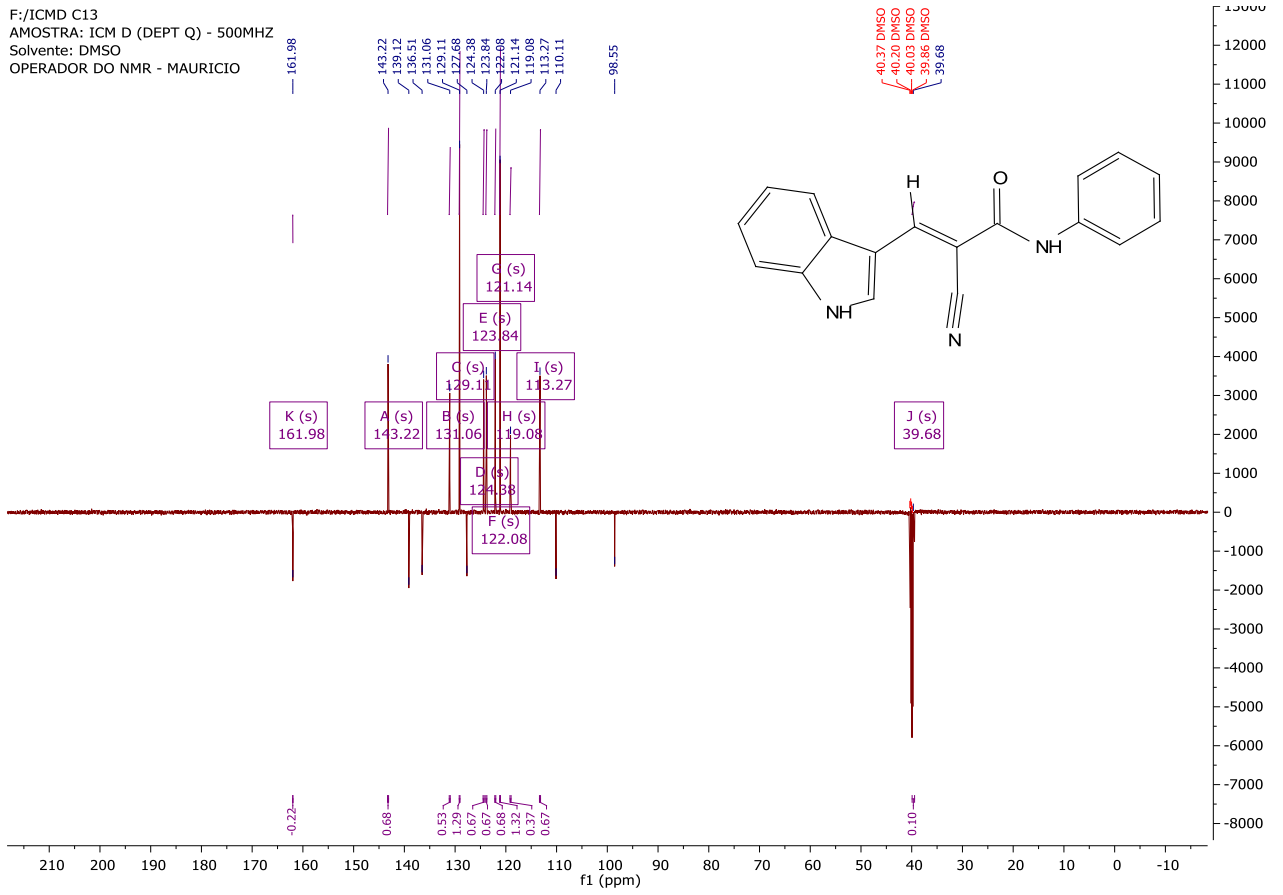

**Figure S4.** HRMS  $m/z$  [ $M^+ + Na$ ] of ICMD-01

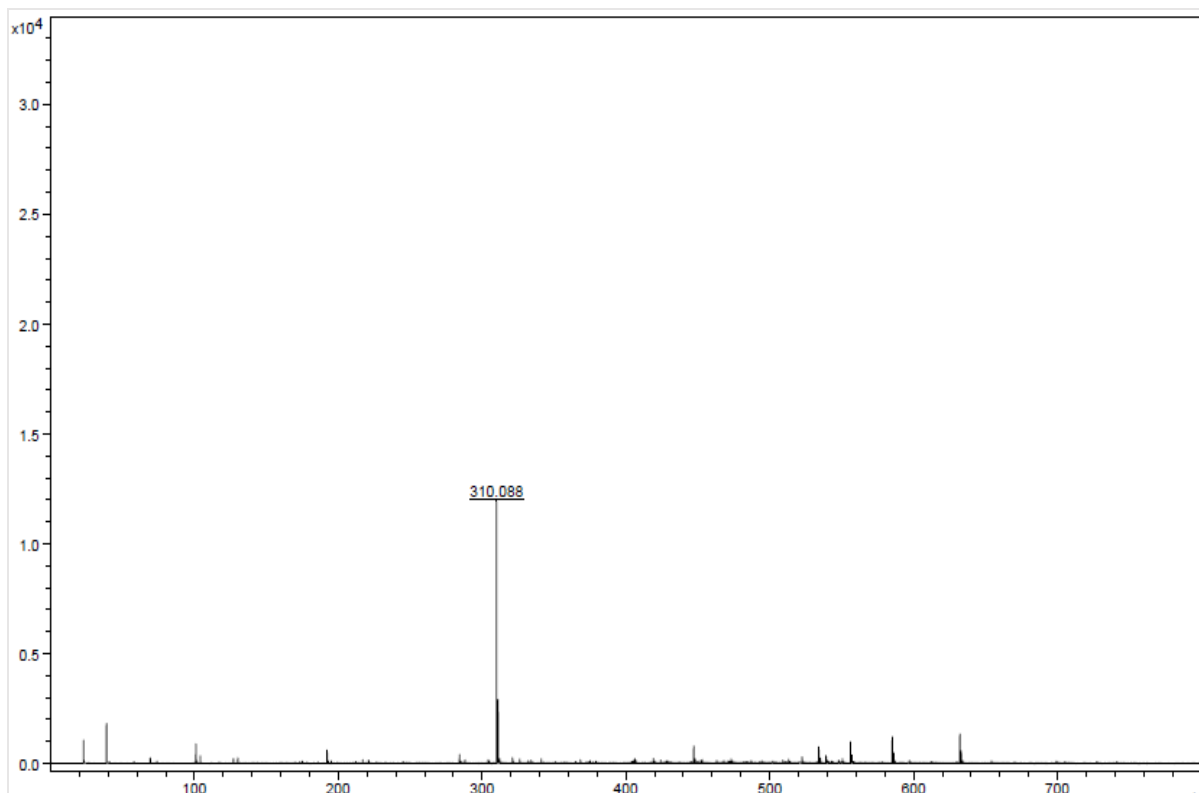

**Figure S5.** 3D crystallographic pose of co-crystallized ligand indomethacin (yellow) and redocked ligand (gray) on binding site of cyclooxygenase-2 (4COX)

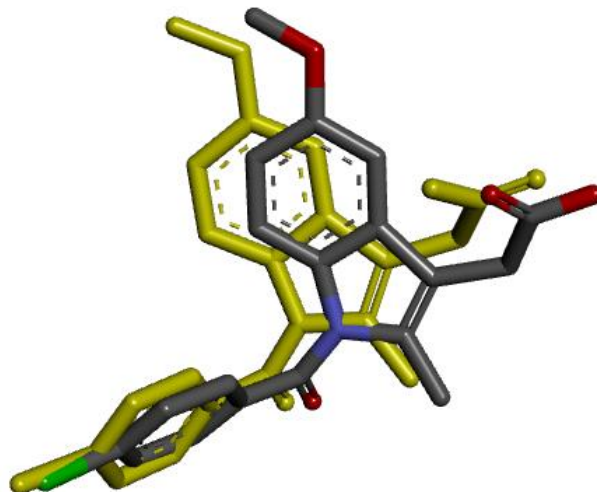

Supplement: ijms-21-02591-s001.pdf [file ijms-21-02591-s001.pdf]
